# Supplementary material
Source: Research Square preprint supplement (doi:10.21203/rs.3.rs-9751578/v1)
Supplement: Supplementary file 1 [file 566d8c8de762e1ad9533b4ca.docx]

File S4: Assessment Tools and Questionnaires

# SECTION 1: CHILD PTSD SYMPTOM SCALE (CPSS-5) - ENGLISH VERSION

Child PTSD Symptom Scale - Fifth Edition

**Interviewer Instructions: "I will read you a list of problems that children sometimes have after experiencing something scary or dangerous. I want you to tell me about the problems your child has had during the past month. For each problem, tell me how often your child has experienced it."**

**Frequency Key:**

- · 0 = Not at all or rarely (once a month)
- · 1 = Sometimes (2-3 times a month)
- · 2 = Often (4-5 times a month)
- · 3 = Almost always (6 times or more a month)

Items (1-20):

Cluster A: Re-experiencing

1. Repeated, disturbing memories of the scary thing that come suddenly

2. Repeated, disturbing dreams about the scary thing

3. Suddenly acting or feeling as if the scary thing were happening again (like feeling it is real)

4. Feeling very upset when something reminds you of the scary thing

5. Having physical reactions in your body (like heart pounding, fast breathing) when something reminds you of the scary thing

Cluster B: Avoidance

1. Trying not to think about or talk about the scary thing

2. Trying to avoid activities, places, or people that remind you of the scary thing

3. Trouble remembering important parts of the scary thing

4. Loss of interest in activities that used to be fun

5. Feeling distant or cut off from other people

6. Trouble feeling positive feelings (like happiness or love)

7. Thinking that your life may end soon

Cluster C: Hyperarousal

1. Trouble falling or staying asleep

2. Feeling irritable or having angry outbursts

3. Trouble concentrating

4. Feeling overly alert or "on guard" all the time

5. Being very jumpy or easily startled

Cluster D: Negative Alterations in Cognition and Mood

1. Blaming yourself or others for the scary thing

2. Having strong negative thoughts about yourself, others, or the world

3. Thinking that the scary thing happened because of something about you

**Scoring:**

- · Total Score: 0-60
- · Clinical Cut-off: ≥ 31
- · Cronbach's Alpha in Yemeni sample: 0.89
- · Sensitivity: 92%
- · Specificity: 85%

Administration Notes: Administered to parents for children under 8 years, self-report for children 8 years and older.

# SECTION 2: PRESCHOOL FEELINGS CHECKLIST (PFC) - ENGLISH VERSION

Preschool Feelings Checklist

**Instructions: "Now I will ask you about your child's feelings and behaviors during the past two weeks."**

**Response Key:**

- · 0 = No, not true
- · 1 = Yes, sometimes true
- · 2 = Yes, very true or often true

Items (1-27):

1. Looked sad, depressed, or unhappy most of the time

2. Lost interest or pleasure in activities he/she used to enjoy

3. Had poor appetite (ate less than usual)

4. Had increased appetite (ate more than usual)

5. Had trouble sleeping

6. Slept too much (more than usual)

7. Looked tired or had little energy most of the time

8. Moved or talked very slowly

9. Moved around constantly (couldn't sit still)

10. Felt worthless or guilty

11. Had trouble thinking or concentrating

12. Talked about death or wanted to die

13. Had frequent temper tantrums

14. Was aggressive toward others (hits, bites, kicks)

15. Often argued with adults

16. Refused to comply with adults' requests or rules

17. Deliberately did things to annoy others

18. Blamed others for his/her mistakes or misbehavior

19. Was easily annoyed or angered

20. Felt resentful or wanted revenge

21. Lied or cheated to get out of responsibilities

22. Stole valuable items from home or school

23. Was truant from school or daycare without permission

24. Was anxious, tense, or fearful most of the time

25. Was worried about separation from parents

26. Was afraid of specific things (animals, places)

27. Complained of physical aches with no clear medical cause

**Scoring:**

- · Total Score: 0-54
- · Clinical Cut-off: ≥ 24
- · Sensitivity in Arabic studies: 82%
- · Specificity in Arabic studies: 78%
- · Administration Time: 15-20 minutes

# SECTION 3: HOUSEHOLD FOOD INSECURITY ACCESS SCALE (HFIAS) - ENGLISH

Household Food Insecurity Access Scale

**Instructions: "Now I will ask you about your household's food situation during the past four months."**

Category 1: Anxiety and Uncertainty about Food Supply

1. In the past four months, did you worry that your household would not have enough food?

- · No
- · Yes, rarely (once or twice)
- · Yes, sometimes (3-10 times)
- · Yes, often (more than 10 times)

1. 2. In the past four months, were you unable to eat the kinds of foods you preferred because of a lack of resources?

- · No
- · Yes, rarely
- · Yes, sometimes
- · Yes, often

Category 2: Insufficient Quality

1. 1. In the past four months, did you or any household member have to eat a limited variety of foods due to a lack of resources?

· No

- · Yes, rarely
- · Yes, sometimes
- · Yes, often

1. 2. In the past four months, did you or any household member have to eat some foods that you really did not want to eat because of a lack of resources to obtain other types of food?

- · No
- · Yes, rarely
- · Yes, sometimes
- · Yes, often

Category 3: Insufficient Quantity

1. 1. In the past four months, did you or any household member have to eat a smaller meal than you felt you needed because there was not enough food?

- · No
- · Yes, rarely
- · Yes, sometimes
- · Yes, often

1. 2. In the past four months, did you or any household member have to eat fewer meals in a day because there was not enough food?

- · No
- · Yes, rarely
- · Yes, sometimes
- · Yes, often

1. 3. In the past four months, was there ever no food to eat of any kind in your household because of lack of resources to get food?

· No

· Yes, rarely

· Yes, sometimes

· Yes, often

4. In the past four months, did you or any household member go to sleep at night hungry because there was not enough food?

· No

· Yes, rarely

· Yes, sometimes

· Yes, often

5. In the past four months, did you or any household member go a whole day and night without eating anything because there was not enough food?

· No

· Yes, rarely

· Yes, sometimes

· Yes, often

**Classification:**

· Food Secure: 0-1

· Mildly Food Insecure: 2-7

· Moderately Food Insecure: 8-14

· Severely Food Insecure: 15-27

Psychometric Properties:

· Cronbach's Alpha in Yemen: 0.91

· Concurrent Validity: 0.85 with FIES scale

· Administration Time: 10-15 minutes

# SECTION 4: CONFLICT EXPOSURE INVENTORY

Conflict Exposure Inventory - Brief Version

**Instructions: "Now I will ask you about your family's experiences with conflict during the past year."**

Exposure Items (0 = No, 1 = Yes):

1. Did your child witness direct acts of violence?

2. Was your family home damaged due to conflict?

3. Did your family lose its main source of income due to conflict?

4. Was your family displaced from your home due to conflict?

5. Was any family member physically injured due to conflict?

6. Did any family member die due to conflict?

7. Was the child separated from parents due to conflict?

8. Was the child directly threatened?

9. Did your family lose access to health services due to conflict?

10. Did your family lose access to clean water due to conflict?

Total Score: 0-10

**Classification: Low (0-3), Moderate (4-7), High (8-10)**

# SECTION 5: DEMOGRAPHIC AND SOCIOECONOMIC QUESTIONNAIRE

Demographic and Socioeconomic Questionnaire

Child Information:

1. Date of Birth: //____

2. Sex: □ Male □ Female

3. Birth Order: ____ of ____

Family Information:

1. Mother's Age: ____ years

2. Father's Age: ____ years

3. Mother's Education (years): ____

4. Father's Education (years): ____

5. Marital Status: □ Married □ Widowed □ Divorced □ Separated

6. Household Size: ____

7. Number of children under 5 years: ____

Housing:

1. Type of Dwelling: □ House □ Tent □ Collective shelter □ Other

2. Housing Tenure: □ Owned □ Rented □ Free lodging

3. Number of Rooms: ____

4. Water Source: □ Public network □ Well □ Tanker truck □ River

5. Sanitation Facilities: □ Household toilet □ Shared toilet □ None

Income and Resources:

1. Main Income Source: □ Employment □ Remittances □ Aid □ Other

2. Approximate Monthly Income: □ Less than 50,000 YER □ 50,000-100,000 □ 100,000-200,000 □ More than 200,000

Health:

1. Is the child fully vaccinated? □ Yes □ No □ Unsure

2. Does the child have any chronic illnesses? □ Yes □ No

3. Is the child taking any iron supplements? □ Yes □ No

Administration Time: 15 minutes

# SECTION 6: LABORATORY ASSESSMENT PROTOCOL

Biological Assessment Protocol

1. Blood Collection:

· Site: Antecubital vein

· Volume: 3 ml

· Tubes: EDTA tubes for hemoglobin, serum tubes for iron and CRP

· Time: 8-10 AM (fasting if possible)

· Storage: Transport within 2 hours, store at -20°C

2. Hemoglobin Analysis:

· Device: HemoCue Hb 301

· Calibration: Daily using controls

· Quality Control: Every 20 samples

· Normal Range (children 6-59 months): 11.0-14.0 g/dL

3. C-reactive Protein Analysis:

· Method: Fluorescence immunoassay (i-CHROMA™)

· Range: 0.5-200 mg/L

· Cut-off for Inflammation: >5 mg/L

· Coefficient of Variation: <5%

4. Ferritin Analysis:

· Method: Fluorescence immunoassay

· Sensitivity: 1 ng/mL

· Reference Range: 12-150 ng/mL

· Considerations: Acute phase reactant, interpret with CRP

5. Quality Assurance:

· Daily calibration of all equipment

· External quality control monthly

· Duplicate measurements for 10% of samples

· Temperature monitoring of all reagents

# SECTION 7: ANTHROPOMETRIC MEASUREMENT PROTOCOL

Anthropometric Assessment

Equipment:

· Weight: Seca 874 scale (calibrated daily)

· Height/Length: ShorrBoard measuring board

· MUAC: UNICEF MUAC tape

· Equipment checked daily for accuracy

Procedures:

1. Weight: Child in light clothing, recorded to nearest 0.1 kg

2. Height/Length:

· Under 2 years: Recumbent length

· 2 years and older: Standing height

· Recorded to nearest 0.1 cm

3. MUAC: Left arm, midpoint between acromion and olecranon

4. Z-scores: Calculated using WHO Anthro software

Quality Control:

· All measurements taken twice

· Third measurement if difference > 0.5 cm or 0.2 kg

· Supervisors re-measure 10% of participants
