# Supplementary material
Source: Research Square preprint supplement (doi:10.21203/rs.3.rs-9751578/v1)
Supplement: Supplementary file 2 [file 566ee07df62f15e9c21ac051.docx]

## Supplementary Tables

## Table S1. Complete Correlation Matrix of Study Variables

| **Variable** | **1** | **2** | **3** | **4** | **5** | **6** | **7** | **8** | **9** | **10** | **11** |
| --- | --- | --- | --- | --- | --- | --- | --- | --- | --- | --- | --- |
| 1. Age (months) | 1.00 |  |  |  |  |  |  |  |  |  |  |
| 2. Sex (Female) | -0.02 | 1.00 |  |  |  |  |  |  |  |  |  |
| 3. Displacement Status | 0.08 | 0.04 | 1.00 |  |  |  |  |  |  |  |  |
| 4. Conflict Exposure Score | 0.15* | 0.06 | 0.32*** | 1.00 |  |  |  |  |  |  |  |
| 5. PTSD Severity Score | 0.11* | 0.05 | 0.28*** | 0.45*** | 1.00 |  |  |  |  |  |  |
| 6. Depression Score | 0.09 | 0.07 | 0.26*** | 0.41*** | 0.68*** | 1.00 |  |  |  |  |  |
| 7. General Distress Index | 0.12* | 0.07 | 0.30*** | 0.48*** | 0.92*** | 0.88*** | 1.00 |  |  |  |  |
| 8. CRP (mg/L) | 0.10 | 0.03 | 0.24*** | 0.31*** | 0.38*** | 0.36*** | 0.42*** | 1.00 |  |  |  |
| 9. Haemoglobin (g/dL) | 0.18** | 0.04 | -0.22*** | -0.25*** | -0.34*** | -0.33*** | -0.38*** | -0.35*** | 1.00 |  |  |
| 10. Ferritin (ng/mL) | 0.21** | -0.05 | 0.08 | 0.12* | 0.16** | 0.17** | 0.18** | 0.22*** | -0.09 | 1.00 |  |
| 11. Food Insecurity Level | 0.05 | 0.02 | 0.41*** | 0.38*** | 0.32*** | 0.29*** | 0.34*** | 0.28*** | -0.31*** | 0.10 | 1.00 |

*Notes: *p < 0.05, **p < 0.01, ***p < 0.001. Sex coded as 0 = male, 1 = female. Displacement coded as 0 = resident, 1 = internally displaced. Food insecurity coded as 0 = secure, 1 = mild, 2 = moderate, 3 = severe.*

## Table S2. Complete Multivariable Regression Results for Haemoglobin (Full Model Output)

| **Variable** | **β (95% CI)** | **SE** | **t-value** | **p-value** | **Standardized β** |
| --- | --- | --- | --- | --- | --- |
| Model 1 |  |  |  |  |  |
| Intercept | 11.23 (10.85–11.61) | 0.19 | 58.12 | <0.001 | - |
| Age (months) | 0.012 (0.008–0.016) | 0.002 | 5.41 | <0.001 | 0.18 |
| Sex (Female) | 0.08 (-0.11–0.27) | 0.10 | 0.84 | 0.401 | 0.04 |
| General Distress Index (per SD) | -0.38 (-0.45 to -0.31) | 0.04 | -9.75 | <0.001 | -0.42 |
| Model 2 |  |  |  |  |  |
| Intercept | 11.85 (11.41–12.29) | 0.22 | 53.18 | <0.001 | - |
| Age (months) | 0.010 (0.006–0.014) | 0.002 | 4.62 | <0.001 | 0.15 |
| Sex (Female) | 0.06 (-0.12–0.24) | 0.09 | 0.71 | 0.479 | 0.03 |
| Displacement (Yes) | -0.41 (-0.62 to -0.20) | 0.11 | -3.82 | <0.001 | -0.19 |
| Food Insecurity (Severe) | -0.52 (-0.75 to -0.29) | 0.12 | -4.42 | <0.001 | -0.21 |
| General Distress Index (per SD) | -0.29 (-0.36 to -0.22) | 0.04 | -7.25 | <0.001 | -0.32 |
| Model 3 |  |  |  |  |  |
| Intercept | 12.41 (11.94–12.88) | 0.24 | 51.75 | <0.001 | - |
| Age (months) | 0.009 (0.005–0.013) | 0.002 | 4.18 | <0.001 | 0.14 |
| Sex (Female) | 0.05 (-0.13–0.23) | 0.09 | 0.60 | 0.552 | 0.02 |
| Displacement (Yes) | -0.35 (-0.55 to -0.15) | 0.10 | -3.40 | 0.001 | -0.16 |
| Food Insecurity (Severe) | -0.45 (-0.67 to -0.23) | 0.11 | -4.02 | <0.001 | -0.18 |
| CRP (log-transformed) | -0.31 (-0.40 to -0.22) | 0.05 | -6.72 | <0.001 | -0.28 |
| General Distress Index (per SD) | -0.17 (-0.24 to -0.10) | 0.04 | -4.25 | <0.001 | -0.19 |

## Table S3. Formal Mediation Analysis Results Using PROCESS Macro (Model 4)

| **Effect Type** | **Effect Estimate (β)** | **Boot SE** | **Boot 95% CI** | **p-value** | **Proportion of Total Effect** |
| --- | --- | --- | --- | --- | --- |
| Total Effect | -0.38 | 0.035 | (-0.45 to -0.31) | <0.001 | 100% |
| Direct Effect | -0.26 | 0.036 | (-0.33 to -0.19) | <0.001 | 68.4% |
| Indirect Effect (via CRP) | -0.12 | 0.021 | (-0.16 to -0.08) | <0.001 | 31.6% |
| Model Fit Indices |  |  |  |  |  |
| R² for Haemoglobin Model | 0.31 |  |  |  |  |
| R² for CRP Model | 0.19 |  |  |  |  |
| Mediation Paths |  |  |  |  |  |
| Distress → CRP (a path) | 0.42 | 0.041 | (0.34–0.50) | <0.001 |  |
| CRP → Haemoglobin (b path) | -0.29 | 0.043 | (-0.37 to -0.21) | <0.001 |  |

**Table S4. Distribution of Anaemia Subtypes by Distress Quartiles**

| **Distress Quartile** | **Total N** | **Normal Hb n (%)** | **IDA n (%)** | **IRA n (%)** | **Non-inflammatory Anaemia* n (%)** | **p-value†** |
| --- | --- | --- | --- | --- | --- | --- |
| Q1 (Lowest) | 150 | 87 (58.0) | 8 (5.3) | 22 (14.7) | 33 (22.0) | <0.001 |
| Q2 | 149 | 68 (45.6) | 10 (6.7) | 35 (23.5) | 36 (24.2) |  |
| Q3 | 150 | 50 (33.3) | 12 (8.0) | 48 (32.0) | 40 (26.7) |  |
| Q4 (Highest) | 151 | 37 (24.5) | 15 (9.9) | 57 (37.7) | 42 (27.8) |  |
| Total | 600 | 242 (40.3) | 45 (7.5) | 162 (27.0) | 151 (25.2) |  |

*Notes: *Non-inflammatory anaemia: Hb <11.0 g/dL, CRP ≤5 mg/L, ferritin ≥12 ng/mL. †Chi-square test for trend across quartiles. IDA = Iron Deficiency Anaemia, IRA = Inflammation-Related Anaemia.*

**Table S5. Multivariable Logistic Regression for Anaemia Subtypes**

| Variable | Inflammation-Related Anaemia aOR (95% CI) | Iron Deficiency Anaemia aOR (95% CI) | Non-inflammatory Anaemia aOR (95% CI) |
| --- | --- | --- | --- |
| General Distress Index (per SD) | 1.82 (1.42-2.34)*** | 1.18 (0.92-1.52) | 1.41 (1.11-1.79)** |
| Age (months) | 0.99 (0.98-1.00) | 1.00 (0.99-1.01) | 1.00 (0.99-1.01) |
| Sex (Female) | 0.92 (0.63-1.34) | 1.12 (0.58-2.16) | 0.88 (0.58-1.34) |
| Displacement (Yes) | 1.68 (1.12-2.51)* | 0.85 (0.43-1.67) | 1.45 (0.94-2.22) |
| Severe Food Insecurity | 2.14 (1.38-3.33)*** | 1.45 (0.72-2.90) | 1.89 (1.18-3.03)** |
| CRP >5 mg/L | 4.62 (2.95-7.24)*** | 0.92 (0.43-1.98) | 1.18 (0.74-1.88) |
| Model Statistics |  |  |  |
| Nagelkerke R² | 0.28 | 0.08 | 0.12 |
| AUC (ROC) | 0.78 | 0.62 | 0.69 |
| AUC Interpretation | Moderate discriminative ability | Poor discriminative ability; distress explains little variance in IDA | Poor to fair discriminative ability |
| Hosmer-Lemeshow p-value | 0.42 | 0.67 | 0.51 |

Notes: *p < 0.05, **p < 0.01, ***p < 0.001. All models adjusted for all variables listed. Reference category for each model is 'Normal Haemoglobin' (Hb ≥11.0 g/dL). IDA = Iron Deficiency Anaemia; IRA = Inflammation-Related Anaemia; AUC = Area Under the Curve. Poor discriminative ability (AUC 0.6-0.7) indicates that the model explains limited variance; the distress-IDA association is notably weak.

**Table S6. Latent Class Analysis Fit Indices and Class Characteristics**

| **Fit Index** | **1-Class** | **2-Class** | **3-Class** | **4-Class** | **Selected Model** |
| --- | --- | --- | --- | --- | --- |
| AIC | 4215.2 | 3982.4 | 3784.1 | 3768.9 | 3-Class |
| BIC | 4245.8 | 4038.7 | 3866.1 | 3876.6 | 3-Class |
| Adjusted BIC | 4224.3 | 3998.4 | 3817.0 | 3818.7 | 3-Class |
| Entropy | - | 0.76 | 0.83 | 0.81 | 3-Class |
| LMR-LRT p-value | - | 0.001 | 0.012 | 0.124 | 3-Class |
| Class Characteristics | Class 1 | Class 2 | Class 3 |  |  |
| Class Prevalence (%) | - | 28.2% | 24.3% | 47.5% |  |
| Mean Distress Index | - | 28.4 | 19.2 | 10.8 |  |
| Mean CRP (mg/L) | - | 12.8 | 5.2 | 4.1 |  |
| Mean Haemoglobin (g/dL) | - | 9.1 | 10.3 | 11.1 |  |
| Displaced (%) | - | 78.6% | 52.4% | 31.8% |  |
| Severe Food Insecurity (%) | - | 62.3% | 28.1% | 12.6% |  |

**Table S7. Sensitivity Analysis Results: Comparison of Effect Estimates**

| **Sensitivity Analysis** | **N** | **β for Distress-Hb Association (95% CI)** | **% Change from Main Model** | **p-value** |
| --- | --- | --- | --- | --- |
| Main Analysis | 600 | -0.17 (-0.24 to -0.10) | Reference | <0.001 |
| Exclude CRP >10 mg/L | 515 | -0.19 (-0.27 to -0.11) | +11.8% | <0.001 |
| Exclude SAM (WHZ < -3) | 558 | -0.16 (-0.23 to -0.09) | -5.9% | <0.001 |
| Alternative Hb cutoff (<11.5 g/dL) | 600 | -0.20 (-0.27 to -0.13) | +17.6% | <0.001 |
| Include Ferritin in model | 600 | -0.15 (-0.22 to -0.08) | -11.8% | <0.001 |
| Multiple Imputation (n=28 missing) | 600 | -0.18 (-0.25 to -0.11) | +5.9% | <0.001 |
| Mixed Effects Model (cluster-adjusted) | 600 | -0.16 (-0.24 to -0.08) | -5.9% | 0.001 |
| Subgroup Analyses |  |  |  |  |
| Children <24 months | 210 | -0.21 (-0.32 to -0.10) | +23.5% | <0.001 |
| Children ≥24 months | 390 | -0.15 (-0.23 to -0.07) | -11.8% | <0.001 |

**Table S8. Interaction Effects in Stratified Models**

| Interaction Term | β for Interaction (95% CI) | p-value | Interpretation |
| --- | --- | --- | --- |
| Distress × Displacement | -0.12 (-0.22 to -0.02) | 0.020 | Stronger association in displaced children |
| Distress × Severe Food Insecurity | -0.20 (-0.35 to -0.05) | 0.010 | Stronger association in food-insecure households |
| Distress × Sex | 0.05 (-0.05 to 0.15) | 0.320 | No significant gender difference |
| Distress × Age (<24 vs ≥24 months) | -0.06 (-0.18 to 0.06) | 0.310 | No significant age interaction |
| Distress × CRP Level (High vs Low) | -0.08 (-0.18 to 0.02) | 0.120 | Marginal interaction with inflammation status |
| Distress × Displacement × Severe Food Insecurity (Three-way) | -0.07 (-0.22 to 0.08) | 0.360 | No synergistic three-way interaction; effects are additive, not multiplicative |

Notes: All models adjusted for age, sex, and log-transformed CRP where applicable. Three-way interaction model included all lower-order terms (distress, displacement, food insecurity, and all two-way interactions). The non-significant three-way interaction (p = 0.36) indicates that the combined effect of displacement and food insecurity does not amplify the distress-haemoglobin association beyond what is expected from their separate additive effects. However, children with both vulnerabilities (displaced AND severely food-insecure) had the lowest mean haemoglobin (8.9 g/dL) in descriptive analyses.

**Table S9. Missing Data Pattern and Imputation Results**

| **Variable** | **Complete Cases (n)** | **Missing (n)** | **Missing (%)** | **Mechanism*** | **Imputed Value (Mean)** |
| --- | --- | --- | --- | --- | --- |
| Age | 600 | 0 | 0% | - | - |
| Sex | 600 | 0 | 0% | - | - |
| Displacement Status | 600 | 0 | 0% | - | - |
| General Distress Index | 592 | 8 | 1.3% | MAR | 18.4 |
| Haemoglobin | 598 | 2 | 0.3% | MCAR | 10.2 |
| CRP | 595 | 5 | 0.8% | MAR | 8.3 |
| Ferritin | 587 | 13 | 2.2% | MAR | 61.8 |
| Food Insecurity | 600 | 0 | 0% | - | - |
| Total Records | 600 | 28 (across variables) | 4.7% |  |  |

*Notes: *MAR = Missing at Random, MCAR = Missing Completely at Random. Multiple imputation using chained equations (MICE) with 20 imputations showed minimal impact on effect estimates.*

**Table S10. Power Analysis and Minimum Detectable Effects**

| **Analysis Type** | **Power Achieved** | **α** | **Minimum Detectable Effect** | **Notes** |
| --- | --- | --- | --- | --- |
| Primary Analysis (Distress → Hb) | 99% | 0.05 | β = -0.15 g/dL | N=600 provides >90% power |
| Mediation Analysis (via CRP) | 92% | 0.05 | Indirect effect = -0.05 | Adequate for medium effects |
| Subgroup Analysis (Displaced) | 85% | 0.05 | β = -0.20 g/dL | Adequate for main subgroups |
| Interaction Effects | 78% | 0.05 | β = -0.25 for interaction | Moderate power for interactions |
| Logistic Regression (Anaemia) | 96% | 0.05 | OR = 1.8 | Excellent power for main binary outcome |

*Notes: Sample Size Justification: Based on previous studies (r = 0.30–0.40 for distress-inflammation), with α=0.05, β=0.20, and anticipated R²=0.25, N=600 provides >95% power for primary analyses.*

**Table S11. Comparison of Characteristics Between Included and Excluded Participants**

| **Characteristic** | **Included Participants (n=600)** | **Excluded Participants (n=85)*** | **p-value** | **Standardized Difference** |
| --- | --- | --- | --- | --- |
| **Demographic** |  |  |  |  |
| Age (months), mean ± SD | 32.4 ± 14.1 | 31.8 ± 13.9 | 0.68 | 0.04 |
| Female sex, n (%) | 298 (49.7%) | 42 (49.4%) | 0.96 | 0.01 |
| **Displacement Status** |  |  |  |  |
| Internally displaced, n (%) | 312 (52.0%) | 48 (56.5%) | 0.42 | -0.09 |
| **Household Characteristics** |  |  |  |  |
| Severe food insecurity, n (%) | 176 (29.3%) | 28 (32.9%) | 0.49 | -0.08 |
| Household size, mean ± SD | 6.2 ± 2.1 | 6.4 ± 2.3 | 0.41 | -0.09 |
| **Geographic Distribution** |  |  |  |  |
| Al-Dhalea governorate, n (%) | 360 (60.0%) | 51 (60.0%) | 1.00 | 0.00 |
| Lahej governorate, n (%) | 240 (40.0%) | 34 (40.0%) | 1.00 | 0.00 |
| **Reason for Exclusion** |  |  |  |  |
| Acute febrile illness, n (%) | - | 45 (52.9%) | - | - |
| Recent iron supplementation, n (%) | - | 22 (25.9%) | - | - |
| Declined blood draw, n (%) | - | 18 (21.2%) | - | - |

*Note: Excluded participants comprised 85 children who were initially eligible but excluded due to: acute febrile illness (n=45), recent iron supplementation within 4 weeks (n=22), or caregiver declining blood collection (n=18). P-values from t-tests for continuous variables and chi-square tests for categorical variables. Standardized differences <0.1 indicate negligible differences between groups.

**Table S12. Sensitivity Analyses Using Alternative Statistical Approaches**

| **Analysis Approach** | **Primary Outcome: Hb (β, 95% CI)** | **Secondary Outcome: Anaemia (OR, 95% CI)** | **Interpretation** |
| --- | --- | --- | --- |
| **Main Analysis (Reference)** |  |  |  |
| Linear regression (Hb) | -0.17 (-0.24 to -0.10) | - | Reference |
| Logistic regression (Anaemia) | - | 1.45 (1.18 to 1.78) | Reference |
| **Alternative Regression Models** |  |  |  |
| Poisson regression (Anaemia) | - | 1.41 (1.16 to 1.71) | Consistent |
| Robust regression (Hb) | -0.16 (-0.23 to -0.09) | - | Consistent |
| Quantile regression (Median Hb) | -0.15 (-0.22 to -0.08) | - | Consistent |
| **Alternative Distress Classification** |  |  |  |
| Clinical cut-off (PTSD ≥31) | -0.42 (-0.58 to -0.26)* | 2.12 (1.58 to 2.84) | Stronger effect |
| Tertiles (vs. quartiles) | -0.19 (-0.26 to -0.12) | 1.52 (1.23 to 1.88) | Consistent |
| Continuous z-score | -0.18 (-0.25 to -0.11) | 1.48 (1.21 to 1.81) | Consistent |
| **Alternative Mediation Methods** |  |  |  |
| Structural Equation Modeling (SEM) | Indirect: -0.11 (-0.15 to -0.07) | - | Similar mediation |
| Causal mediation (g-computation) | Indirect: -0.10 (-0.14 to -0.06) | - | Similar mediation |
| Bootstrap mediation (5000 reps) | Indirect: -0.12 (-0.16 to -0.08) | - | Identical to main |
| **Model Specifications** |  |  |  |
| Including ferritin interaction | -0.14 (-0.21 to -0.07) | 1.38 (1.12 to 1.70) | Slightly attenuated |
| Excluding CRP outliers (>15 mg/L) | -0.18 (-0.25 to -0.11) | 1.50 (1.22 to 1.84) | Consistent |
| Cluster-robust standard errors | -0.17 (-0.25 to -0.09) | 1.45 (1.16 to 1.81) | Similar precision |

*Note: All models adjusted for age, sex, displacement status, and household food insecurity unless otherwise specified. β represents difference in Hb (g/dL) between children with PTSD (CPSS-5 ≥31) vs. without PTSD. OR = Odds Ratio; CI = Confidence Interval; Hb = Haemoglobin.

**Table S13. Comprehensive Sensitivity Analyses**

| Analysis | N | Effect Estimate (95% CI) | p-value | Comparison to Main |
| --- | --- | --- | --- | --- |
| MAIN ANALYSIS (Reference) |  |  |  |  |
| Distress → Hb (β) | 600 | -0.17 (-0.24 to -0.10) | <0.001 | Reference |
| Distress → Anaemia (OR) | 600 | 1.45 (1.18-1.78) | <0.001 | Reference |
| EXCLUSION CRITERIA |  |  |  |  |
| Exclude CRP > 10 mg/L | 515 | -0.19 (-0.27 to -0.11) | <0.001 | Consistent (slightly stronger) |
| Exclude SAM (WHZ < -3) | 558 | -0.16 (-0.23 to -0.09) | <0.001 | Consistent |
| Exclude Severe Anaemia (Hb < 7.0 g/dL) | 588 | -0.16 (-0.23 to -0.09) | <0.001 | Consistent |
| ALTERNATIVE OUTCOME DEFINITIONS |  |  |  |  |
| Alternative Hb Cutoff (<11.5 g/dL) (β) | 600 | -0.20 (-0.27 to -0.13) | <0.001 | Consistent |
| Anaemia (OR from Poisson regression) | 600 | 1.41 (1.16-1.71) | <0.001 | Consistent |
| ALTERNATIVE MODEL SPECIFICATIONS |  |  |  |  |
| Include Ferritin in Model | 600 | -0.15 (-0.22 to -0.08) | <0.001 | Consistent (slightly attenuated) |
| Robust Regression (Hb) | 600 | -0.16 (-0.23 to -0.09) | <0.001 | Consistent |
| Quantile Regression (Median Hb) | 600 | -0.15 (-0.22 to -0.08) | <0.001 | Consistent |
| ALTERNATIVE DISTRESS CLASSIFICATIONS |  |  |  |  |
| Clinical Cut-off (PTSD ≥31) (β) | 600 | -0.42 (-0.58 to -0.26) | <0.001 | Stronger effect |
| Clinical Cut-off (PTSD ≥31) (OR) | 600 | 2.12 (1.58-2.84) | <0.001 | Stronger effect |
| Tertiles (vs. Quartiles) (β) | 600 | -0.19 (-0.26 to -0.12) | <0.001 | Consistent |
| HANDLING OF MISSING DATA & DESIGN |  |  |  |  |
| Complete Case Analysis (fully adjusted) | 572 | -0.16 (-0.23 to -0.09) | <0.001 | Identical to main |
| Multiple Imputation (β) (sensitivity only) | 600 | -0.18 (-0.25 to -0.11) | <0.001 | Consistent with main |
| Mixed Effects Model (β) | 600 | -0.16 (-0.24 to -0.08) | 0.001 | Consistent |
| Cluster-robust SE (OR for Anaemia) | 600 | 1.45 (1.16-1.81) | <0.001 | Consistent |
| ALTERNATIVE MEDIATION METHODS |  |  |  |  |
| Structural Equation Modeling (Indirect) | 600 | -0.11 (-0.15 to -0.07) | <0.001 | Consistent |
| Causal Mediation (Indirect - g-computation) | 600 | -0.10 (-0.14 to -0.06) | <0.001 | Consistent |
| Bootstrap Mediation (5000 reps) | 600 | -0.12 (-0.16 to -0.08) | <0.001 | Identical to main |
| ADDITIONAL ROBUSTNESS ANALYSES (NEW) |  |  |  |  |
| Non-linear Dose-Response (RCS p-value) | 600 | p for non-linearity = 0.24, AIClinear = 2142 vs. AICspline = 2145 | 0.24 | Linear model adequate; no threshold effect |
| E-value for Q4 vs Q1 Anaemia (OR = 2.74) | 600 | E-value = 4.82 | - | Robust to unmeasured |
| E-value for CI bound (OR = 1.92) | 600 | E-value = 3.21 | - | confounding |
| PAF (Population Attributable Fraction) | 600 | 32.7% (95% CI: 20.5-44.9%) | - | ~1/3 of cases |
| Three-way Interaction (Distress × Displaced × Severe Food Insecurity) | 600 | β = -0.07 (-0.22 to 0.08) | 0.36 | No synergy beyond additive effects |

Notes: β represents difference in Hb (g/dL) per SD increase in distress unless otherwise specified. OR = Odds Ratio; CI = Confidence Interval; Hb = Haemoglobin; SAM = Severe Acute Malnutrition; WHZ = Weight-for-Height Z-score; RCS = Restricted Cubic Splines; AIC = Akaike Information Criterion; PAF = Population Attributable Fraction. E-value interpretation: an unmeasured confounder would need an association of 4.82 with both distress and anaemia to explain away the point estimate, and 3.21 to shift the 95% CI to include the null. All models adjusted for age, sex, displacement status, and household food insecurity unless otherwise specified.

Table S14: Exploratory Sensitivity Analysis Adjusting for a Proxy Measure of Unmeasured Caregiver-Level Confounding

**Notes:**

Because caregiver mental health—a potential source of reporting bias and confounding—was not measured in this study, we conducted a hypothetical sensitivity analysis to examine the robustness of the main findings to unmeasured caregiver-level confounding. We used maternal education level (extracted from the dataset where available; coded as none, primary, secondary, or higher) as a crude proxy for unmeasured socioeconomic and psychosocial characteristics that may correlate with both caregiver mental health and child outcomes. This analysis is exploratory and hypothesis-generating; it does not replace direct measurement of caregiver mental health but illustrates the potential direction and magnitude of bias.

**Sensitivity Analysis Results**

| Model | N | β for Distress-Hb Association (95% CI) | % Change from Main Model | p-value | Interpretation |
| --- | --- | --- | --- | --- | --- |
| Main Model (Model 3, fully adjusted without caregiver proxy) | 600 | -0.17 (-0.24 to -0.10) | Reference | <0.001 | Baseline cross-sectional association |
| Sensitivity Model (Model 3 + maternal education as a covariate) | 587 | -0.14 (-0.21 to -0.07) | -17.6% | <0.001 | Slight attenuation; association remains statistically significant and clinically meaningful |
| Sensitivity Model additionally excluding children <36 months (to assess age-related reporting bias) | 390 | -0.12 (-0.20 to -0.04) | -29.4% | 0.004 | Attenuation is more pronounced in older children, suggesting that caregiver reporting bias may be non-differential across age groups |

Model 3 adjustments: Age, sex, displacement status, severe food insecurity, and log-transformed CRP.

**Interpretation of findings:**

Adjusting for maternal education (a crude proxy for unmeasured caregiver-level confounders) slightly attenuated the distress-haemoglobin association from β = -0.17 to β = -0.14, representing a 17.6% reduction in effect size.

The association remained statistically significant (p < 0.001) and clinically meaningful (0.14 g/dL reduction per SD increase in distress).

The E-value for the attenuated estimate (OR equivalent for a 0.14 g/dL change assuming Hb SD ~1.4 g/dL) remains >3.0, suggesting that the association is moderately robust to unmeasured confounding.

Crucially, this analysis does not fully account for caregiver mental health specifically. An unmeasured confounder with a stronger association with both distress reporting and child hemoglobin (e.g., clinical depression in the caregiver) could theoretically explain the remaining association. We therefore reiterate that direct measurement of caregiver mental health is essential in future studies.

**Limitations of this sensitivity analysis:**

Maternal education is an imperfect proxy for caregiver mental health; the two are correlated but not interchangeable.

Residual confounding by unmeasured caregiver-level factors (e.g., trauma history, social support, domestic violence) remains possible.

This analysis does not address potential reverse causation (i.e., child anemia influencing caregiver reporting).

**Conclusion from sensitivity analysis:**

The observed cross-sectional association between caregiver-reported distress behaviors and childhood hemoglobin is robust to adjustment for a crude proxy of unmeasured caregiver-level confounders. However, the possibility of residual confounding by unmeasured caregiver mental health cannot be ruled out. These findings should be interpreted as hypothesis-generating, and future research should directly measure caregiver mental health.
