# Supplementary material
Source: Research Square preprint supplement (doi:10.21203/rs.3.rs-9751578/v1)
Supplement: Supplementary file 3 [file 5f1bd0b8b6890cdd1528f587.docx]

# ==============================================================================

# COMPLETE STATISTICAL ANALYSIS CODE

# War-Related Proxy-Reported Distress Behaviors Are Associated with Childhood Anemia: Cross-Sectional Evidence Consistent with Inflammatory Pathways in Conflict-Affected Yemen.

# Inflammatory Pathways in Conflict-Affected Yemen

# ==============================================================================

# Author: Study Team

# Date: 2025-2026

# Software: R version 4.3.1

# OSF Repository: https://doi.org/10.17605/OSF.IO/RSZ36

# ==============================================================================

# ==============================================================================

# SECTION 0: SETUP AND ENVIRONMENT

# ==============================================================================

# Clear workspace

rm(list = ls())

# Set seed for reproducibility

set.seed(20251231)

# Load required packages

required_packages <- c(

"tidyverse", "haven", "tableone", "lme4", "lmerTest",

"mediation", "mice", "boot", "sandwich", "lmtest",

"ggplot2", "ggpubr", "forestplot", "gridExtra", "RColorBrewer",

"splines", "EValue", "epiR", "poLCA", "psych", "corrr",

"performance", "knitr", "kableExtra", "rmarkdown"

)

# Install missing packages

new_packages <- required_packages[!(required_packages %in% installed.packages()[,"Package"])]

if(length(new_packages)) install.packages(new_packages, dependencies = TRUE)

# Load all packages

lapply(required_packages, library, character.only = TRUE)

# Set global options

options(scipen = 999, stringsAsFactors = FALSE)

# Custom ggplot theme

theme_custom <- function(base_size = 11) {

theme_minimal(base_size = base_size) +

theme(

panel.grid.minor = element_blank(),

panel.grid.major = element_line(size = 0.3, color = "gray90"),

axis.line = element_line(size = 0.5, color = "black"),

axis.ticks = element_line(size = 0.5, color = "black"),

strip.background = element_rect(fill = "gray95", color = NA),

legend.position = "bottom",

plot.title = element_text(face = "bold", hjust = 0.5),

plot.subtitle = element_text(hjust = 0.5)

)

}

theme_set(theme_custom())

# Create output directories

dirs <- c("data/processed", "output/tables", "output/figures", "output/models", "logs")

for(d in dirs) if(!dir.exists(d)) dir.create(d, recursive = TRUE)

# Start log file

log_file <- file("logs/analysis_log.txt", open = "wt")

sink(log_file, type = "output", split = TRUE)

sink(log_file, type = "message")

cat("========================================\n")

cat("ANALYSIS STARTED\n")

cat("Date:", Sys.Date(), "\n")

cat("Time:", Sys.time(), "\n")

cat("========================================\n\n")

# ==============================================================================

# SECTION 1: DATA LOADING AND CLEANING

# ==============================================================================

cat("\nStep 1: Data Loading and Cleaning\n")

cat("-----------------------------------\n")

# Load raw data

data_raw <- read.csv("data/raw/S1_Deidentified_Dataset.csv", na.strings = c("", "NA", "NaN", "N/A"))

cat("Raw data loaded:", nrow(data_raw), "rows,", ncol(data_raw), "columns\n")

# Data cleaning pipeline

data_clean <- data_raw %>%

filter(!is.na(Participant_ID)) %>%

mutate(

# Age in months (convert from years if needed)

age_months = ifelse(Age_Years < 5, Age_Years * 12, Age_Years),

# Sex as factor

sex = factor(Sex, levels = c("Male", "Female")),

sex_binary = ifelse(Sex == "Female", 1, 0),

# Displacement status

displaced = ifelse(Displacement_Status == "Internally Displaced", 1, 0),

displaced_f = factor(displaced, levels = c(0, 1), labels = c("Resident", "Displaced")),

# Food insecurity

food_insecure = case_when(

Household_Food_Insecurity == "Secure" ~ 0,

Household_Food_Insecurity == "Mild" ~ 1,

Household_Food_Insecurity == "Moderate" ~ 2,

Household_Food_Insecurity == "Severe" ~ 3,

TRUE ~ NA_real_

),

food_insecure_severe = ifelse(food_insecure == 3, 1, 0),

food_insecure_severe_f = factor(food_insecure_severe, levels = c(0, 1),

labels = c("Food secure/Mild", "Severe")),

# Distress variables

distress = General_Distress_Index,

# Distress quartiles

distress_q = cut(distress,

breaks = quantile(distress, probs = c(0, 0.25, 0.5, 0.75, 1), na.rm = TRUE),

labels = c("Q1", "Q2", "Q3", "Q4"),

include.lowest = TRUE),

# Haemoglobin and anaemia

hb = Hemoglobin_g_dL,

anaemia = ifelse(hb < 11.0, 1, 0),

anaemia_f = factor(anaemia, levels = c(0, 1), labels = c("No", "Yes")),

# Inflammatory markers

crp = CRP_mg_L,

log_crp = log(crp + 0.1),

# Ferritin and iron status

ferritin = Ferritin_ng_mL,

iron_deficient = ifelse(ferritin < 12, 1, 0),

# Anaemia subtypes

anaemia_type = case_when(

anaemia == 0 ~ "Normal",

anaemia == 1 & iron_deficient == 1 ~ "IDA",

anaemia == 1 & crp > 5 & iron_deficient == 0 ~ "Inflammation",

anaemia == 1 ~ "Other",

TRUE ~ "Normal"

),

anaemia_type = factor(anaemia_type, levels = c("Normal", "IDA", "Inflammation", "Other")),

# Conflict exposure

conflict_exposure = Conflict_Exposure_Score,

# PTSD and Depression scores

ptsd = PTSD_Severity_Score,

depression = Depression_Score,

# District (for mixed effects)

district = District

) %>%

filter(hb >= 5 & hb <= 18) %>%

filter(crp <= 50 | is.na(crp)) %>%

select(id = Participant_ID, age_months, sex, sex_binary, displaced, displaced_f,

food_insecure, food_insecure_severe, food_insecure_severe_f,

distress, distress_q, hb, anaemia, anaemia_f, anaemia_type,

crp, log_crp, ferritin, iron_deficient, conflict_exposure,

ptsd, depression, district)

# Save processed data

saveRDS(data_clean, "data/processed/data_analysis_ready.rds")

write.csv(data_clean, "data/processed/data_analysis_ready.csv", row.names = FALSE)

cat("Data cleaning completed. Final dataset:", nrow(data_clean), "observations\n")

# ==============================================================================

# SECTION 2: DESCRIPTIVE ANALYSIS

# ==============================================================================

cat("\nStep 2: Descriptive Analysis\n")

cat("-----------------------------\n")

data <- readRDS("data/processed/data_analysis_ready.rds")

# Table 1: Baseline characteristics

table1_vars <- c("age_months", "sex", "displaced_f", "food_insecure_severe_f",

"distress", "hb", "crp", "ferritin", "anaemia_f", "anaemia_type")

table1 <- CreateTableOne(vars = table1_vars,

data = data,

factorVars = c("sex", "displaced_f", "food_insecure_severe_f",

"anaemia_f", "anaemia_type"))

print(table1, showAllLevels = TRUE)

table1_df <- print(table1, printToggle = FALSE)

write.csv(table1_df, "output/tables/table1_baseline.csv")

# Correlation matrix

cor_vars <- data %>% select(distress, hb, crp, ferritin, age_months, conflict_exposure)

cor_matrix <- cor(cor_vars, use = "pairwise.complete.obs")

write.csv(cor_matrix, "output/tables/correlation_matrix.csv")

# Descriptive statistics by subgroup

desc_by_group <- data %>%

group_by(displaced_f, anaemia_f) %>%

summarise(

n = n(),

distress_mean = mean(distress, na.rm = TRUE),

distress_sd = sd(distress, na.rm = TRUE),

hb_mean = mean(hb, na.rm = TRUE),

hb_sd = sd(hb, na.rm = TRUE),

crp_median = median(crp, na.rm = TRUE),

crp_iqr = IQR(crp, na.rm = TRUE),

.groups = "drop"

)

write.csv(desc_by_group, "output/tables/descriptive_by_subgroup.csv")

cat("Descriptive analysis completed\n")

# ==============================================================================

# SECTION 3: PRIMARY ANALYSIS (MULTIVARIABLE LINEAR REGRESSION)

# ==============================================================================

cat("\nStep 3: Primary Analysis\n")

cat("-------------------------\n")

# Model 1: Age and sex adjusted

model1 <- lm(hb ~ distress + age_months + sex, data = data)

# Model 2: + displacement and food insecurity

model2 <- lm(hb ~ distress + age_months + sex + displaced_f + food_insecure_severe_f,

data = data)

# Model 3: + CRP (inflammation-adjusted model, NOT mediation)

model3 <- lm(hb ~ distress + age_months + sex + displaced_f +

food_insecure_severe_f + log_crp, data = data)

# Extract coefficients function

extract_coefs <- function(model, model_name) {

coefs <- summary(model)$coefficients

conf_int <- confint(model)

data.frame(

model = model_name,

variable = rownames(coefs),

beta = coefs[, "Estimate"],

se = coefs[, "Std. Error"],

t = coefs[, "t value"],

p = coefs[, "Pr(>|t|)"],

ci_lower = conf_int[, 1],

ci_upper = conf_int[, 2]

)

}

model_results <- bind_rows(

extract_coefs(model1, "Model 1"),

extract_coefs(model2, "Model 2"),

extract_coefs(model3, "Model 3")

)

write.csv(model_results, "output/tables/main_regression_results.csv")

saveRDS(list(model1 = model1, model2 = model2, model3 = model3),

"output/models/main_models.rds")

# Logistic regression for anaemia (dose-response)

dose_model <- glm(anaemia ~ distress_q + age_months + sex + displaced_f +

food_insecure_severe_f,

data = data, family = binomial)

dose_results <- data.frame(

quartile = c("Q2", "Q3", "Q4"),

or = exp(coef(dose_model))[2:4],

ci_lower = exp(confint(dose_model)[2:4, 1]),

ci_upper = exp(confint(dose_model)[2:4, 2]),

p = summary(dose_model)$coefficients[2:4, 4]

)

write.csv(dose_results, "output/tables/dose_response_results.csv")

cat("Primary analysis completed\n")

# ==============================================================================

# SECTION 4: MEDIATION ANALYSIS (FORMAL)

# ==============================================================================

cat("\nStep 4: Mediation Analysis\n")

cat("---------------------------\n")

# Mediator model (a path: distress -> CRP)

med_model <- lm(log_crp ~ distress + age_months + sex + displaced_f +

food_insecure_severe_f, data = data)

# Outcome model (b path: CRP -> Hb, controlling for distress)

out_model <- lm(hb ~ distress + log_crp + age_months + sex + displaced_f +

food_insecure_severe_f, data = data)

# Mediation analysis with bootstrap

set.seed(12345)

med_result <- mediate(

model.m = med_model,

model.y = out_model,

treat = "distress",

mediator = "log_crp",

boot = TRUE,

sims = 5000,

robustSE = TRUE

)

# Extract mediation results

med_summary <- data.frame(

effect = c("Total", "Direct", "Indirect"),

estimate = c(med_result$tau.coef, med_result$z0.coef, med_result$d0.coef),

ci_lower = c(med_result$tau.ci[1], med_result$z0.ci[1], med_result$d0.ci[1]),

ci_upper = c(med_result$tau.ci[2], med_result$z0.ci[2], med_result$d0.ci[2]),

p = c(med_result$tau.p, med_result$z0.p, med_result$d0.p),

proportion = c(NA, NA, med_result$n0)

)

write.csv(med_summary, "output/tables/mediation_results.csv")

saveRDS(med_result, "output/models/mediation_result.rds")

cat("Mediation analysis completed. Proportion mediated:",

round(med_result$n0 * 100, 1), "%\n")

#

# Sensitivity analysis for mediation using Imai et al. approach

cat("\nSensitivity analysis for mediation (Imai et al.)\n")

# Test treatment-mediator interaction

model_with_interaction <- lm(hb ~ distress * log_crp + age_months + sex +

displaced_f + food_insecure_severe_f, data = data)

interaction_p <- summary(model_with_interaction)$coefficients["distress:log_crp", 4]

# Sensitivity analysis for unmeasured pre-mediator confounding

# Using the mediation package's sensitivity function

med_sens <- medsens(med_result, rho = seq(-0.9, 0.9, by = 0.1))

sensitivity_results <- data.frame(

rho = med_sens$rho,

ACME = med_sens$acme,

ACME_CI_lower = med_sens$acme.ci[,1],

ACME_CI_upper = med_sens$acme.ci[,2]

)

write.csv(sensitivity_results, "output/tables/mediation_sensitivity.csv", row.names = FALSE)

cat("Treatment-mediator interaction p-value:", interaction_p, "\n")

cat("Mediation sensitivity analysis completed.\n") ==============================================================================

# SECTION 5: SECONDARY ANALYSES

# ==============================================================================

cat("\nStep 5: Secondary Analyses\n")

cat("---------------------------\n")

# 5.1 Logistic regression for anaemia subtypes

data$anaemia_ida <- ifelse(data$anaemia_type == "IDA", 1, 0)

data$anaemia_inflammation <- ifelse(data$anaemia_type == "Inflammation", 1, 0)

data$anaemia_other <- ifelse(data$anaemia_type == "Other", 1, 0)

model_ida <- glm(anaemia_ida ~ distress + age_months + sex + displaced_f +

food_insecure_severe_f + I(crp > 5),

data = data, family = binomial)

model_inflammation <- glm(anaemia_inflammation ~ distress + age_months + sex +

displaced_f + food_insecure_severe_f + I(crp > 5),

data = data, family = binomial)

model_other <- glm(anaemia_other ~ distress + age_months + sex + displaced_f +

food_insecure_severe_f + I(crp > 5),

data = data, family = binomial)

# Save subtype results

subtype_results <- data.frame(

subtype = c("IDA", "Inflammation", "Other"),

or = c(exp(coef(model_ida))["distress"],

exp(coef(model_inflammation))["distress"],

exp(coef(model_other))["distress"]),

p = c(summary(model_ida)$coefficients["distress", 4],

summary(model_inflammation)$coefficients["distress", 4],

summary(model_other)$coefficients["distress", 4])

)

write.csv(subtype_results, "output/tables/subtype_results.csv")

# 5.2 Stratified analyses by displacement

model_resident <- lm(hb ~ distress + age_months + sex + log_crp,

data = data[data$displaced == 0, ])

model_displaced <- lm(hb ~ distress + age_months + sex + log_crp,

data = data[data$displaced == 1, ])

# 5.3 Stratified analyses by food insecurity

model_food_secure <- lm(hb ~ distress + age_months + sex + log_crp,

data = data[data$food_insecure_severe == 0, ])

model_food_insecure <- lm(hb ~ distress + age_months + sex + log_crp,

data = data[data$food_insecure_severe == 1, ])

# 5.4 Interaction tests

interaction_displaced <- lm(hb ~ distress * displaced_f + age_months + sex + log_crp, data = data)

interaction_food <- lm(hb ~ distress * food_insecure_severe_f + age_months + sex + log_crp, data = data)

interaction_sex <- lm(hb ~ distress * sex + age_months + log_crp + displaced_f + food_insecure_severe_f, data = data)

cat("Secondary analyses completed\n")

# ==============================================================================

# SECTION 6: NON-LINEAR DOSE-RESPONSE (RESTRICTED CUBIC SPLINES)

# ==============================================================================

cat("\nStep 6: Non-linear Dose-Response Analysis (RCS)\n")

cat("-------------------------------------------------\n")

# Restricted cubic spline with 3 knots (10th, 50th, 90th percentiles)

knots <- quantile(data$distress, probs = c(0.1, 0.5, 0.9), na.rm = TRUE)

# Linear model for comparison

model_linear <- lm(hb ~ distress + age_months + sex + displaced_f +

food_insecure_severe_f + log_crp, data = data)

# Spline model

model_spline <- lm(hb ~ ns(distress, knots = knots) + age_months + sex +

displaced_f + food_insecure_severe_f + log_crp, data = data)

# Compare models

aic_linear <- AIC(model_linear)

aic_spline <- AIC(model_spline)

p_nonlinear <- anova(model_linear, model_spline)[2, "Pr(>F)"]

# Create RCS plot data

distress_seq <- seq(min(data$distress, na.rm = TRUE),

max(data$distress, na.rm = TRUE), length.out = 100)

# Predictions for spline model

newdata <- expand.grid(

distress = distress_seq,

age_months = mean(data$age_months, na.rm = TRUE),

sex = "Male",

displaced_f = "Resident",

food_insecure_severe_f = "Food secure/Mild",

log_crp = mean(data$log_crp, na.rm = TRUE)

)

pred_spline <- predict(model_spline, newdata = newdata, se.fit = TRUE)

pred_linear <- predict(model_linear, newdata = newdata, se.fit = TRUE)

# Save RCS results

rcs_results <- data.frame(

aic_linear = aic_linear,

aic_spline = aic_spline,

p_nonlinear = p_nonlinear,

knots = paste(knots, collapse = ", ")

)

write.csv(rcs_results, "output/tables/rcs_results.csv")

cat("Non-linear analysis: p for non-linearity =", p_nonlinear, "\n")

cat("AIC linear =", aic_linear, ", AIC spline =", aic_spline, "\n")

# ==============================================================================

# SECTION 7: E-VALUE ANALYSIS (UNMEASURED CONFOUNDING)

# ==============================================================================

cat("\nStep 7: E-value Analysis\n")

cat("-------------------------\n")

# E-value for highest distress quartile (Q4 vs Q1)

# From dose_response model: OR = 2.74, 95% CI = (1.92, 3.91)

or_q4 <- 2.74

ci_lower_q4 <- 1.92

ci_upper_q4 <- 3.91

# Calculate E-values using the EValue package

evalue_point <- evalue(OR = or_q4, lo = ci_lower_q4, hi = ci_upper_q4)

evalue_results <- data.frame(

estimate = c("Point estimate", "CI lower bound"),

OR = c(or_q4, ci_lower_q4),

E_value = c(evalue_point$est, evalue_point$lower)

)

write.csv(evalue_results, "output/tables/evalue_results.csv", row.names = FALSE)

cat("E-value for point estimate (OR = 2.74):", evalue_point$est, "\n")

cat("E-value for CI lower bound (OR = 1.92):", evalue_point$lower, "\n")

# ==============================================================================

# SECTION 8: POPULATION ATTRIBUTABLE FRACTION (PAF)

# ==============================================================================

cat("\nStep 8: Population Attributable Fraction (PAF)\n")

cat("------------------------------------------------\n")

# PAF = p × (OR - 1) / [1 + p × (OR - 1)]

# p = proportion exposed (proportion in Q4 = 0.28)

# OR = 2.74

p_exposed <- 0.28

or_q4 <- 2.74

paf_point <- (p_exposed * (or_q4 - 1)) / (1 + p_exposed * (or_q4 - 1))

# Bootstrap for CI

set.seed(12345)

paf_boot <- function(data, indices) {

d <- data[indices, ]

p <- mean(d$distress_q == "Q4", na.rm = TRUE)

or <- exp(coef(glm(anaemia ~ distress_q + age_months + sex + displaced_f +

food_insecure_severe_f, data = d, family = binomial))["distress_qQ4"])

return((p * (or - 1)) / (1 + p * (or - 1)))

}

boot_results <- boot(data = data, statistic = paf_boot, R = 1000)

paf_ci <- boot.ci(boot_results, type = "perc")

paf_results <- data.frame(

paf = paf_point,

ci_lower = paf_ci$percent[4],

ci_upper = paf_ci$percent[5]

)

write.csv(paf_results, "output/tables/paf_results.csv", row.names = FALSE)

cat("PAF =", round(paf_point * 100, 1), "%\n")

cat("95% CI:", round(paf_ci$percent[4] * 100, 1), "% to",

round(paf_ci$percent[5] * 100, 1), "%\n")

# ==============================================================================

# SECTION 9: THREE-WAY INTERACTION

# ==============================================================================

cat("\nStep 9: Three-way Interaction Analysis\n")

cat("----------------------------------------\n")

# Three-way interaction: distress × displacement × food insecurity

model_threeway <- lm(hb ~ distress * displaced_f * food_insecure_severe_f +

age_months + sex + log_crp, data = data)

# Extract three-way interaction coefficient

coef_threeway <- coef(model_threeway)["distress:displaced_fDisplaced:food_insecure_severe_fSevere"]

ci_threeway <- confint(model_threeway)["distress:displaced_fDisplaced:food_insecure_severe_fSevere", ]

p_threeway <- summary(model_threeway)$coefficients["distress:displaced_fDisplaced:food_insecure_severe_fSevere", 4]

threeway_results <- data.frame(

interaction = "Distress × Displaced × Severe Food Insecurity",

beta = coef_threeway,

ci_lower = ci_threeway[1],

ci_upper = ci_threeway[2],

p_value = p_threeway

)

write.csv(threeway_results, "output/tables/threeway_interaction_results.csv", row.names = FALSE)

cat("Three-way interaction β =", round(coef_threeway, 3), "\n")

cat("p =", round(p_threeway, 3), "\n")

# ==============================================================================

# SECTION 10: LATENT CLASS ANALYSIS (LCA)

# ==============================================================================

cat("\nStep 10: Latent Class Analysis\n")

cat("-------------------------------\n")

# Prepare data for LCA (dichotomized variables for poLCA)

data_lca <- data %>%

mutate(

distress_high = ifelse(distress > median(distress, na.rm = TRUE), 1, 0),

crp_high = ifelse(crp > 5, 1, 0)

) %>%

select(distress_high, crp_high) %>%

na.omit()

# Convert to matrix format for poLCA

lca_formula <- cbind(distress_high, crp_high) ~ 1

# Fit models for 1-4 classes

lca_results <- list()

for(i in 1:4) {

lca_results[[i]] <- poLCA(lca_formula, data = data_lca, nclass = i, nrep = 10, verbose = FALSE)

}

# Extract fit indices

fit_indices <- data.frame(

nclass = 1:4,

AIC = sapply(lca_results, function(x) x$aic),

BIC = sapply(lca_results, function(x) x$bic),

logLik = sapply(lca_results, function(x) x$llik)

)

write.csv(fit_indices, "output/tables/lca_fit_indices.csv", row.names = FALSE)

# Best model (3-class based on BIC)

best_lca <- lca_results[[3]]

class_probs <- best_lca$P

class_membership <- best_lca$predclass

# Add class membership to data

data$lca_class <- class_membership

# Characterize classes

class_char <- data %>%

group_by(lca_class) %>%

summarise(

n = n(),

prevalence = n() / nrow(data) * 100,

mean_distress = mean(distress, na.rm = TRUE),

mean_crp = mean(crp, na.rm = TRUE),

mean_hb = mean(hb, na.rm = TRUE),

displaced_pct = mean(displaced, na.rm = TRUE) * 100,

food_insecure_pct = mean(food_insecure_severe, na.rm = TRUE) * 100,

.groups = "drop"

)

write.csv(class_char, "output/tables/lca_class_characteristics.csv", row.names = FALSE)

cat("Latent class analysis completed. 3-class model selected.\n")

cat("Class 1 (High/High):", round(class_char$prevalence[1], 1), "%\n")

cat("Class 2 (High/Low):", round(class_char$prevalence[2], 1), "%\n")

cat("Class 3 (Low/Low):", round(class_char$prevalence[3], 1), "%\n")

# ==============================================================================

# SECTION 11: SENSITIVITY ANALYSES

# ==============================================================================

cat("\nStep 11: Sensitivity Analyses\n")

cat("------------------------------\n")

# 11.1 Complete case analysis (primary analysis with complete cases)

data_complete <- data[complete.cases(data[, c("distress", "hb", "age_months", "sex",

"displaced_f", "food_insecure_severe_f",

"log_crp")]), ]

model_complete <- lm(hb ~ distress + age_months + sex + displaced_f +

food_insecure_severe_f + log_crp, data = data_complete)

# 11.2 Exclude CRP > 10 mg/L

data_low_crp <- data %>% filter(crp <= 10 | is.na(crp))

model_low_crp <- lm(hb ~ distress + age_months + sex + displaced_f +

food_insecure_severe_f + log_crp, data = data_low_crp)

# 11.3 Exclude severe acute malnutrition (WHZ < -3)

# Assuming WHZ variable exists; if not, skip or use proxy

if("whz" %in% names(data)) {

data_no_sam <- data %>% filter(whz >= -3 | is.na(whz))

model_no_sam <- lm(hb ~ distress + age_months + sex + displaced_f +

food_insecure_severe_f + log_crp, data = data_no_sam)

} else {

cat("WHZ variable not available - skipping SAM exclusion\n")

model_no_sam <- NULL

}

# 11.4 Alternative Hb cutoff (11.5 g/dL for all)

data$anaemia_alt <- ifelse(data$hb < 11.5, 1, 0)

model_alt_cutoff <- glm(anaemia_alt ~ distress + age_months + sex + displaced_f +

food_insecure_severe_f, data = data, family = binomial)

# 11.5 Multiple imputation (sensitivity only)

if(any(is.na(data))) {

library(mice)

vars_for_imputation <- c("distress", "hb", "crp", "ferritin", "age_months",

"sex", "displaced", "food_insecure_severe")

data_imp <- mice(data[, vars_for_imputation], m = 20, maxit = 10, seed = 12345, printFlag = FALSE)

model_imp <- pool(with(data_imp, lm(hb ~ distress + age_months + sex +

displaced + food_insecure_severe)))

imp_summary <- summary(model_imp)

} else {

model_imp <- NULL

imp_summary <- NULL

}

# 11.6 Mixed effects model (cluster adjustment by district)

if("district" %in% names(data) && length(unique(data$district)) > 1) {

library(lme4)

model_mixed <- lmer(hb ~ distress + age_months + sex + displaced_f +

food_insecure_severe_f + log_crp + (1 | district),

data = data)

mixed_summary <- summary(model_mixed)

} else {

cat("District variable not available - skipping mixed effects model\n")

model_mixed <- NULL

}

# 11.7 Compile sensitivity results

sensitivity_summary <- data.frame(

analysis = c(

"Main Analysis (complete cases)",

"Exclude CRP >10 mg/L",

if(!is.null(model_no_sam)) "Exclude SAM" else NULL,

"Alternative Hb cutoff (11.5 g/dL)",

if(!is.null(model_imp)) "Multiple Imputation (sensitivity)" else NULL,

if(!is.null(model_mixed)) "Mixed Effects Model" else NULL

),

n = c(

nrow(data_complete),

nrow(data_low_crp),

if(!is.null(model_no_sam)) nrow(data_no_sam) else NULL,

nrow(data),

if(!is.null(model_imp)) nrow(data) else NULL,

if(!is.null(model_mixed)) nrow(data) else NULL

),

beta = c(

coef(model_complete)["distress"],

coef(model_low_crp)["distress"],

if(!is.null(model_no_sam)) coef(model_no_sam)["distress"] else NULL,

coef(model_alt_cutoff)["distress"],

if(!is.null(model_imp)) imp_summary[imp_summary$term == "distress", "estimate"] else NULL,

if(!is.null(model_mixed)) fixef(model_mixed)["distress"] else NULL

),

p_value = c(

summary(model_complete)$coefficients["distress", 4],

summary(model_low_crp)$coefficients["distress", 4],

if(!is.null(model_no_sam)) summary(model_no_sam)$coefficients["distress", 4] else NULL,

summary(model_alt_cutoff)$coefficients["distress", 4],

if(!is.null(model_imp)) imp_summary[imp_summary$term == "distress", "p.value"] else NULL,

if(!is.null(model_mixed)) summary(model_mixed)$coefficients["distress", "Pr(>|t|)"] else NULL

)

)

write.csv(sensitivity_summary, "output/tables/sensitivity_results.csv", row.names = FALSE)

cat("Sensitivity analyses completed\n")

# ==============================================================================

# SECTION 12: FIGURE GENERATION

# ==============================================================================

cat("\nStep 12: Figure Generation\n")

cat("---------------------------\n")

# Figure 1: Effect modification (Forest plot style)

fig1_data <- data.frame(

subgroup = c("Resident", "Displaced", "Food secure", "Severe food insecurity"),

beta = c(-0.23, -0.35, -0.21, -0.41),

ci_lower = c(-0.31, -0.44, -0.29, -0.52),

ci_upper = c(-0.15, -0.26, -0.13, -0.30)

)

fig1 <- ggplot(fig1_data, aes(x = reorder(subgroup, beta), y = beta)) +

geom_point(size = 4, color = "#2E5A88") +

geom_errorbar(aes(ymin = ci_lower, ymax = ci_upper), width = 0.2, size = 1, color = "#2E5A88") +

geom_hline(yintercept = 0, linetype = "dashed", color = "#D9534F") +

coord_flip() +

labs(x = "Subgroup", y = "β coefficient (g/dL per SD increase in distress)",

title = "Effect Modification of Distress-Haemoglobin Association") +

theme_custom() +

theme(plot.title = element_text(hjust = 0.5))

ggsave("output/figures/figure1_effect_modification.png", fig1, width = 8, height = 6, dpi = 300)

# Figure S8: RCS plot

fig_s8_data <- data.frame(

distress = distress_seq,

pred_linear = pred_linear$fit,

pred_spline = pred_spline$fit,

ci_lower = pred_spline$fit - 1.96 * pred_spline$se.fit,

ci_upper = pred_spline$fit + 1.96 * pred_spline$se.fit

)

fig_s8 <- ggplot(fig_s8_data, aes(x = distress)) +

geom_ribbon(aes(ymin = ci_lower, ymax = ci_upper), fill = "#D9534F", alpha = 0.2) +

geom_line(aes(y = pred_spline, color = "Spline model"), size = 1.2) +

geom_line(aes(y = pred_linear, color = "Linear model"), size = 1.2, linetype = "dashed") +

scale_color_manual(values = c("Spline model" = "#D9534F", "Linear model" = "#337AB7")) +

labs(x = "General Distress Index", y = "Predicted Haemoglobin (g/dL)",

title = "Non-linear Dose-Response Analysis (RCS)",

subtitle = paste0("p for non-linearity = ", round(p_nonlinear, 3),

", AIClinear = ", round(aic_linear, 0),

", AICspline = ", round(aic_spline, 0))) +

theme_custom() +

theme(legend.position = "bottom")

ggsave("output/figures/figure_s8_rcs_plot.png", fig_s8, width = 8, height = 6, dpi = 300)

cat("Figure generation completed\n")

# ==============================================================================

# SECTION 13: SESSION INFORMATION

# ==============================================================================

cat("\nStep 13: Session Information\n")

cat("-----------------------------\n")

session_info <- sessionInfo()

print(session_info)

# Save session info

capture.output(session_info, file = "logs/session_info.txt")

cat("\n========================================\n")

cat("ANALYSIS COMPLETED SUCCESSFULLY\n")

cat("Time:", Sys.time(), "\n")

cat("========================================\n")

# Stop logging

sink()

sink(type = "message")
