# Supplementary material
Source: Research Square preprint supplement (doi:10.21203/rs.3.rs-9751578/v1)
Supplement: Supplementary file 4 [file 60bfed38568ced36c611c3f4.docx]

**Supplementary Figures**

Figure S1. Participant flow diagram

A total of 750 households were assessed for eligibility. After excluding 150 households (65 did not meet age criteria, 45 declined to participate, 28 had acute illness, 12 other reasons), 600 children completed the full assessment and were included in the final analytical sample.

Figure S2. Geographical distribution of sampling clusters across ten districts in southern Yemen.

The bar chart shows mean General Distress Index scores by district. The highest mean distress was observed in Al-Habilayn (21.3), followed by Habil Jabr (20.7) and Al-Hussein (20.1). The map inset (not shown here) indicates the approximate locations of the ten districts in Al-Dhalea and Lahej governorates.

Figure S3. Correlation matrix of key study variables.

Values represent Pearson correlation coefficients (r). Distress showed a moderate positive correlation with CRP (r = 0.42, p < 0.001) and a moderate negative correlation with haemoglobin (r = -0.38, p < 0.001). CRP was inversely correlated with haemoglobin (r = -0.35, p < 0.001). All correlations are statistically significant at p < 0.05 unless otherwise noted. Darker blue indicates stronger positive correlations; darker red indicates stronger negative correlations.

Figure S4. Mediation pathway diagram.

Standardized coefficients from formal mediation analysis (PROCESS macro, 5000 bootstrap iterations). The indirect effect of psychological distress on haemoglobin through C-reactive protein (CRP) was -0.12 (95% CI: -0.16 to -0.08), accounting for 31.6% of the total effect. ***p < 0.001.

Figure S5. Latent class profiles based on psychological distress and inflammatory markers. Three distinct classes were identified.

Class 1 (High Distress/High Inflammation, 28.2% of sample) had the highest distress scores (mean 28.4) and CRP levels (mean 12.8 mg/L) but the lowest haemoglobin (mean 9.1 g/dL). Class 3 (Low Distress/Low Inflammation, 47.5% of sample) had the lowest distress (mean 10.8) and CRP (mean 4.1 mg/L) but the highest haemoglobin (mean 11.1 g/dL). Class 2 (High Distress/Low Inflammation, 24.3%) showed intermediate values.

Figure S6. Sensitivity analysis forest plot.

Each row represents a different sensitivity analysis with the estimated β coefficient (per SD increase in distress on haemoglobin in g/dL) and 95% confidence interval. All sensitivity analyses produced effect estimates consistent with the main analysis (β = -0.17; 95% CI: -0.24 to -0.10), confirming the robustness of the findings. SAM = severe acute malnutrition; Hb = haemoglobin.

Figure S7. Dose-response relationship between psychological distress quartiles and mean haemoglobin concentration.

Mean haemoglobin decreased progressively across increasing distress quartiles: Q1 (42.1% anaemia prevalence, mean Hb 11.2 g/dL), Q2 (54.3%, 10.4 g/dL), Q3 (66.8%, 9.8 g/dL), and Q4 (78.5%, 9.2 g/dL). p for trend < 0.001. The linear model adequately captured the association with no evidence of non-linearity (p for non-linearity = 0.24 from restricted cubic spline analysis). Error bars represent 95% confidence intervals.

Figure S8. Non-linear dose-response analysis using restricted cubic splines (RCS)

Predicted hemoglobin (g/dL) across the range of General Distress Index scores, adjusted for age, sex, displacement status, severe food insecurity, and log-transformed CRP. The solid red line represents the spline model with three knots (placed at the 10th, 50th, and 90th percentiles of the distress distribution). The dashed blue line represents the linear model for comparison. Shaded red area represents the 95% confidence interval for the spline model. The non-linear term was not statistically significant (p for non-linearity = 0.24). Akaike Information Criterion favoured the linear model (AIClinear = 2142 vs. AICspline = 2145), indicating that a linear dose-response model adequately captures the distress-haemoglobin association with no evidence of a threshold effect.
