# Supplementary material
Source: Research Square preprint supplement (doi:10.21203/rs.3.rs-9751578/v1)
Supplement: Supplementary file 5 [file 80a7397d25e4124fdfe8d11a.docx]

**File S3: Ethical Approvals and Consent Forms**

# PART 1: INSTITUTIONAL REVIEW BOARD APPROVAL

RADFAN COLLEGE UNIVERSITY

Institutional Review Board for Human Subjects Research

Al-Habilayn, Lahej Governorate, Yemen

IRB APPROVAL CERTIFICATE

IRB Reference Number: YEM-IRB-2025-093

Date of Approval: 20 June 2025

Expiration Date: 19 June 2026

**Study Title:**

War-Related Proxy-Reported Distress Behaviors Are Associated with Childhood Anemia: Cross-Sectional Evidence Consistent with Inflammatory Pathways in Conflict-Affected Yemen.

**Principal Investigator:**

Naif Taleb Ali, PhD

IRB Category: Expedited Review (Category 7)

Risk Level: Minimal Risk

**APPROVAL CONDITIONS:**

1. 1. This approval is valid for one year from the date of issue.
2. 2. Any modifications to the protocol must receive prior IRB approval.
3. 3. All adverse events must be reported within 48 hours.
4. 4. A final report must be submitted upon study completion.

IRB Chair Signature: \_\_\_\_\_\_\_\_\_\_\_\_\_\_\_\_\_\_\_\_\_\_\_\_\_

IRB Stamp: \[RADFAN COLLEGE UNIVERSITY IRB SEAL\]

# PART 1B: GOVERNMENTAL HEALTH AUTHORITY APPROVAL

MINISTRY OF PUBLIC HEALTH - AL-DHALEA GOVERNORATE

Health Office of Al-Dhalea

Endorsement Certificate

Reference Number: Endorsement letter dated 15 June 2025

Date of Endorsement: 15 June 2025

**Study Title:**

War-Related Psychological Distress is Associated with Childhood Anemia: Evidence for Inflammatory Pathways in Conflict-Affected Yemen

**Principal Investigator:**

Naif Taleb Ali, PhD

**ENDORSEMENT CONDITIONS:**

The study was reviewed and endorsed by the local health authorities in Al-Dhalea governorate, confirming that:

1. 1. The research activities align with regional health priorities.
2. 2. The planned referral pathways for children identified with severe anaemia or malnutrition are consistent with existing health system protocols.
3. 3. The study does not interfere with ongoing humanitarian health operations in the district.

Official Stamp: \[MINISTRY OF PUBLIC HEALTH - AL-DHALEA GOVERNORATE SEAL\]

Authorized Signature: \_\_\_\_\_\_\_\_\_\_\_\_\_\_\_\_\_\_\_\_\_\_\_\_\_

Date: 15 June 2025

# PART 2: INFORMED CONSENT FORM (ENGLISH VERSION)

INFORMED CONSENT FORM FOR RESEARCH PARTICIPATION

Study Title: War-Related Psychological Distress is Associated with Childhood Anemia: Evidence for Inflammatory Pathways in Conflict-Affected Yemen

Principal Investigator: Naif Taleb Ali, PhD | Institution: Radfan College University, Lahej, Yemen

INTRODUCTION: You are being invited to participate in a research study. Before you decide whether to participate, it is important that you understand why the research is being done and what it involves. Please read the following information carefully. Ask if there is anything that is not clear or if you would like more information.

PURPOSE OF THE STUDY: This research aims to understand how war-related stress affects children's health in conflict-affected areas, particularly focusing on anaemia and inflammation.

STUDY PROCEDURES: If you agree to participate, the study procedures will include:

- · Interview with the parent/guardian (30 minutes) about the child's social and health background.
- · Psychological assessment of the child using validated questionnaires (completed by the parent/guardian).
- · Small blood sample (3 ml) collected by a trained phlebotomist.
- · Measurement of the child's weight and height.

**RISKS AND BENEFITS:**

Risks: The child may feel slight discomfort during blood draw (similar to a mosquito bite). There is no anticipated psychological risk.

Benefits: Free anaemia screening, free referral for treatment if needed, contribution to improving health services for children in Yemen.

CONFIDENTIALITY: All data will be anonymized with identifying information removed. Data will be stored securely. Only the research team will have access to the data. Your family's name will not appear in any publication.

VOLUNTARY PARTICIPATION: Participation in this research is completely voluntary. You may withdraw at any time without consequences. You may also refuse to answer any question.

COMPENSATION: Transportation costs will be compensated as per local standards.

CONTACT FOR QUESTIONS: If you have any questions about the research, you may contact the research team through the local community health office or via email at n.taleb@ust.edu.

**PARENTAL CONSENT:**

I acknowledge that I have read and understood the information above (or it has been read and explained to me). All my questions have been adequately answered. I voluntarily agree to my child's participation in this research.

Parent/Guardian Name: \_\_\_\_\_\_\_\_\_\_\_\_\_\_\_\_\_\_\_\_\_\_\_\_

Signature: \_\_\_\_\_\_\_\_\_\_\_\_\_\_\_\_\_\_\_\_\_\_\_\_

Date: \_\_/\_\_/2025

Thumbprint (if applicable): \[ \]

Witness (if parent/guardian is illiterate):

Witness Name: \_\_\_\_\_\_\_\_\_\_\_\_\_\_\_\_\_\_\_\_\_\_\_\_

Witness Signature: \_\_\_\_\_\_\_\_\_\_\_\_\_\_\_\_\_\_\_\_\_\_\_\_

Relationship to participant: \_\_\_\_\_\_\_\_\_\_\_\_\_\_\_\_\_\_\_\_\_\_\_\_

# PART 3: CHILD ASSENT SCRIPT (ENGLISH AND ARABIC)

English Version

For children 7 years and older:

"Hello! I'm from the health research team. We want to help children be healthy and strong. May I ask for your help? We will do a small blood test to see if you need vitamins to become stronger. It will feel like a small mosquito bite. Do you agree to this? You can say yes or no, and that's completely fine."

For younger children (under 7 years): Explained to parents who explain to the child in age-appropriate language.

Arabic Version (النسخة العربية)

للأطفال من عمر 7 سنوات فأكثر:

"مرحباً! أنا من فريق البحث الصحي. نريد مساعدة الأطفال ليكونوا أصحاء وأقوياء. هل تسمح لي أن أطلب مساعدتك؟ سنقوم بفحص دم صغير لمعرفة ما إذا كنت بحاجة إلى فيتامينات لتصبح أقوى. سيكون الإحساس مثل قرصة بعوضة صغيرة. هل توافق على ذلك؟ يمكنك أن تقول نعم أو لا، وهذا أمر طبيعي تماماً."

للأطفال الأصغر من 7 سنوات: يتم الشرح للوالدين ليشرحوا للطفل بلغة مناسبة لعمره.

# PART 4: DATA PROTECTION AND SECURITY PROTOCOL

**Data Anonymization Procedures**

- · All personal identifiers removed
- · Names replaced with unique codes (P001-P600)
- · Addresses generalized to district level only
- · Dates of birth converted to age in months
- · GPS coordinates not collected

**Data Storage and Security**

Primary storage: Encrypted devices (AES-256)

Backup: Secure cloud storage with restricted access

Field data: Password-protected tablets

Paper forms: Stored securely in locked cabinets, shredded after digitization

Access: Only named research team members

**Data Sharing**

De-identified data and analysis code are publicly available through the Open Science Framework (OSF) repository: https://doi.org/10.17605/OSF.IO/RSZ36

# PART 5: COMMUNITY ENGAGEMENT DOCUMENTATION

**Community Entry Permissions**

- · Engagement with district health representatives in all ten study districts
- · Written permissions from local community leaders (village elders and sheikhs)
- · Collaboration with existing humanitarian health partners (where present)
- · Community meetings held prior to data collection to explain study purpose

**Key Agreements Made with Communities**

Communication: Research team to provide updates to community leaders

Results dissemination: Findings to be shared in community meetings

Local capacity: Priority hiring of local field staff from within the communities

Referral pathway: Clear agreement on referral of severe cases to local health facilities

# PART 6: ETHICAL CONSIDERATIONS FOR CONFLICT SETTINGS

**Special Protections for Vulnerable Groups**

- · Extra protections for internally displaced persons (IDPs)
- · Female researchers for female participants where culturally appropriate
- · Respect for local customs and traditions (including dress codes and gender segregation)
- · No data collection in active combat zones

**Safety Protocols for Research Team**

- · Research teams travel in pairs (never alone)
- · Daily check-ins with field supervisor
- · Emergency evacuation plans for each district
- · Safe spaces for interviews (private, secure locations)
- · No night-time data collection

**Referral Pathways Established**

- · Memorandum of Understanding (MoU) with local health facilities in each district
- · Emergency transport support available for severe cases
- · Pre-arranged referral for:
- · Severe anaemia (Hb < 7.0 g/dL)
- · Severe acute malnutrition (WHZ < -3)
- · Any unexpected medical emergency

# PART 7: ADVERSE EVENT REPORTING PROCEDURES

**Reporting Protocol**

Severity Action Timeline

Minor events (e.g., minor bruising from blood draw) Documented and reviewed by PI Within 72 hours

Moderate events (e.g., vasovagal reaction) Reported to IRB with corrective action plan Within 48 hours

Serious events (e.g., any unexpected hospitalization) Immediate reporting, study pause pending review Within 24 hours

**Emergency Action Plan**

1. 1. Immediate medical attention provided by trained team
2. 2. Transportation to nearest health facility if needed
3. 3. Documentation of event using standardized form
4. 4. Notification of IRB and local health authority
5. 5. Ongoing support for affected participant and family

**Contact for Adverse Event Reporting**

Principal Investigator: Naif Taleb Ali, PhD

Email: n.taleb@ust.edu

# PART 8: DECLARATION OF CONFLICT OF INTEREST

The authors declare that they have no competing financial or non-financial interests related to this research. No funding was received for this study. The research was conducted independently without influence from any commercial or political entity.
