# Supplementary material
Source: Research Square preprint supplement (doi:10.21203/rs.3.rs-9751578/v1)
Supplement: Supplementary file 6 [file d5c1b2ee9652f2c81968d589.docx]

File S6: Study Protocol

# 1. STUDY TITLE

War-Related Proxy-Reported Distress Behaviors Are Associated with Childhood Anemia: Cross-Sectional Evidence Consistent with Inflammatory Pathways in Conflict-Affected Yemen.

# 2. HYPOTHESES

- Primary Hypothesis:

Higher psychological distress scores will be associated with lower haemoglobin concentrations, and this association will be partially mediated by systemic inflammation (CRP).

- Secondary Hypotheses:

1. 1. A dose-response relationship exists between distress severity and anaemia prevalence
2. 2. Displacement status and food insecurity modify the distress-anaemia association
3. 3. Inflammation-related anaemia will be more strongly associated with distress than iron deficiency anaemia

# 3. METHODS

3.1 Study Design: Community-based analytical cross-sectional study

3.2 Setting: Ten districts in Al-Dhalea and Lahej governorates, Southern Yemen

3.3 Timeline: July-December 2025

3.4 Sample Size: 600 children (age 6-59 months)

3.5 Sampling: Multistage cluster sampling with probability proportional to size

# 4. DATA COLLECTION PROCEDURES

4.1 Training: 2-week training for field teams

4.2 Data Collection Tools: Electronic tablets with ODK Collect

4.3 Quality Control: 10% random back-check, daily data validation

# 5. VARIABLE DEFINITIONS

5.1 Primary Exposure: General Distress Index (composite of PTSD and depression scores)

5.2 Primary Outcome: Haemoglobin concentration (g/dL)

5.3 Mediator: High-sensitivity C-reactive protein (mg/L)

5.4 Confounders: Age, sex, displacement status, household food insecurity

# 6. STATISTICAL ANALYSIS PLAN

6.1 Primary Analysis: Sequential multivariable linear regression

6.2 Secondary Analyses: Logistic regression, mediation analysis, latent class analysis

6.3 Sensitivity Analyses: Multiple specifications and exclusions

6.4 Software: R version 4.3.1, Stata 18

# 7. ETHICAL CONSIDERATIONS

7.1 Informed Consent: Written consent from caregivers, assent from children ≥7 years

7.2 Confidentiality: Data anonymization, secure storage

7.3 Benefits: Free anaemia testing and referral

7.4 Risks: Minimal (brief discomfort during blood draw)

# 8. DISSEMINATION PLAN

8.1 Publications: Open access in international journal

8.2 Policy Briefs: Arabic and English versions for Yemeni authorities

8.3 Community Feedback: Results shared with participating communities

# 9. STUDY TEAM

Principal Investigator: N.T.A.

Co-Investigators: 3 researchers

Field Team: 15 trained data collectors

Laboratory Technicians: 3 certified phlebotomists

# 10. FUNDING AND SUPPORT

Funding Source: None

In-kind Support: Radfan College University

Equipment: Donated by Radfan College University

# 11. PROTOCOL AMENDMENTS

Any amendments will be submitted to the IRB for approval before implementation.

File S7: Field Training Manual

# Section 1: Introduction to the Study

Goal: Understand the biopsychosocial connections between war-related distress and child anaemia

# Section 2: Ethical Conduct

- Key Principles:

1. Respect: Treat all participants with dignity

2. Beneficence: Maximize benefits, minimize harms

3. Justice: Fair participant selection

4. Confidentiality: Protect all personal information

# Section 3: Participant Recruitment

- Step-by-Step Guide:

1. Community entry and leader engagement

2. Household listing and random selection

3. Eligibility screening

4. Informed consent process

5. Documentation

# Section 4: Data Collection Procedures

4.1 Interview Techniques:

- Active listening
- Non-judgmental attitude
- Child-friendly approach
- Privacy maintenance

4.2 Psychological Assessment:

- Administering CPSS-5 and PFC
- Handling distress reactions
- Referral pathways for severe cases

4.3 Anthropometric Measurements:

- Weight: Seca 874 scale (calibrated daily)
- Height/Length: ShorrBoard
- MUAC: UNICEF tapes

4.4 Blood Collection Protocol:

- Aseptic technique
- Pediatric phlebotomy
- Post-procedure care
- Emergency response (rare)

# Section 5: Data Quality Assurance

Daily Checks:

- Complete all required fields
- Logical consistency
- Range checks
- Missing data review

Weekly:

- Supervisor verification
- Random back-checks (10%)
- Data validation meetings

# Section 6: Safety and Security

Field Safety:

- Always work in pairs
- Regular check-ins
- Security situation monitoring
- Emergency evacuation plan

Participant Safety:

- Recognize signs of distress
- Psychological first aid
- Emergency medical referral

# Section 7: Troubleshooting Guide

Common Issues and Solutions:

1. Participant refusal: Respect decision, document reason

2. Data collection interruption: Note reason, reschedule if possible

3. Equipment failure: Use backup equipment, report immediately

4. Security incident: Follow emergency protocol

# Section 8: References and Resources

- Yemen Ministry of Health guidelines
- WHO child growth standards
- Psychological first aid manual
- Emergency contact numbers

File S8: Pre-analysis Plan

# 1. DATE REGISTERED

June 1, 2025 (prior to data collection)

# 2. HYPOTHESES (Pre-specified)

**2.1 Primary Hypothesis:**

H₁: Each standard deviation increase in General Distress Index will be associated with a reduction of ≥0.20 g/dL in haemoglobin concentration, adjusting for age and sex.

**2.2 Secondary Hypotheses:**

- H₂: CRP will mediate ≥25% of the distress-haemoglobin association.
- H₃: Children in the highest distress quartile will have ≥2.0 times higher odds of anaemia compared to the lowest quartile.
- H₄: The distress-haemoglobin association will be stronger among displaced children (β difference ≥0.10).

# 3. ANALYSIS PLAN

**3.1 Primary Analysis Model:**

Hb_i = β₀ + β₁Distress_i + β₂Age_i + β₃Sex_i + β₄Displacement_i + β₅FoodInsecurity_i + β₆log(CRP_i) + ε_i

- 3.2 Covariate Adjustment Strategy:
- Model 1: Age + Sex
- Model 2: Model 1 + Displacement + Food Insecurity
- Model 3: Model 2 + log(CRP)

**3.3 Primary Outcome:**

- Continuous: Haemoglobin (g/dL)
- Binary: Anaemia (Hb < 11.0 g/dL)

# 4. STATISTICAL DECISION RULES

4.1 Significance Level: α = 0.05 (two-tailed)

4.2 Multiple Testing: No adjustment for secondary analyses (exploratory)

4.3 Missing Data: Multiple imputation (m=20) if missing <10%

4.4 Outliers: Winsorize at 1st and 99th percentiles

4.5 Model Assumptions: Check residuals, heteroscedasticity, multicollinearity

# 5. SENSITIVITY ANALYSES (Pre-specified)

1. Exclude CRP >10 mg/L

2. Exclude severe acute malnutrition

3. Alternative anaemia cutoffs

4. Multiple imputation

5. Mixed effects models (cluster adjustment)

# 6. SUBGROUP ANALYSES

- Pre-specified subgroups:

1. 1. Displacement status (resident vs. displaced)
2. 2. Food insecurity (severe vs. non-severe)
3. 3. Age (<24 vs. ≥24 months)
4. 4. Sex

# 7. MEDIATION ANALYSIS SPECIFICATION

Model:

- Path a: Distress → CRP
- Path b: CRP → Haemoglobin
- Method: Bootstrap (5000 iterations)
- Proportion mediated: (a×b)/(a×b + c′)

# 8. SAMPLE SIZE JUSTIFICATION

Power Calculation:

- Effect size: f² = 0.15 (medium)
- α = 0.05, β = 0.20
- Required N: 85 for primary analysis
- Actual N: 600 (adequate power for all analyses)

# 9. SOFTWARE AND CODE

Software: R 4.3.1

Packages: tidyverse, mediation, lme4, mice

Code Repository: GitHub (private during review)

# 10. DEVIATIONS FROM PLAN

Any deviations will be documented and justified in the manuscript.
